# Supplementary material for: Geographical and social isolation drive the evolution of Austronesian languages
Source: PLoS One. 2020 Dec 1;15(12):e0243171. doi: 10.1371/journal.pone.0243171 (PMC7707576; doi:10.1371/journal.pone.0243171)
Supplement: S1 Fig — It is composed of all the languages included in Gray et al. [39] for which the Pulotu [69] database had an entry. (DOCX) [file pone.0243171.s001.docx]

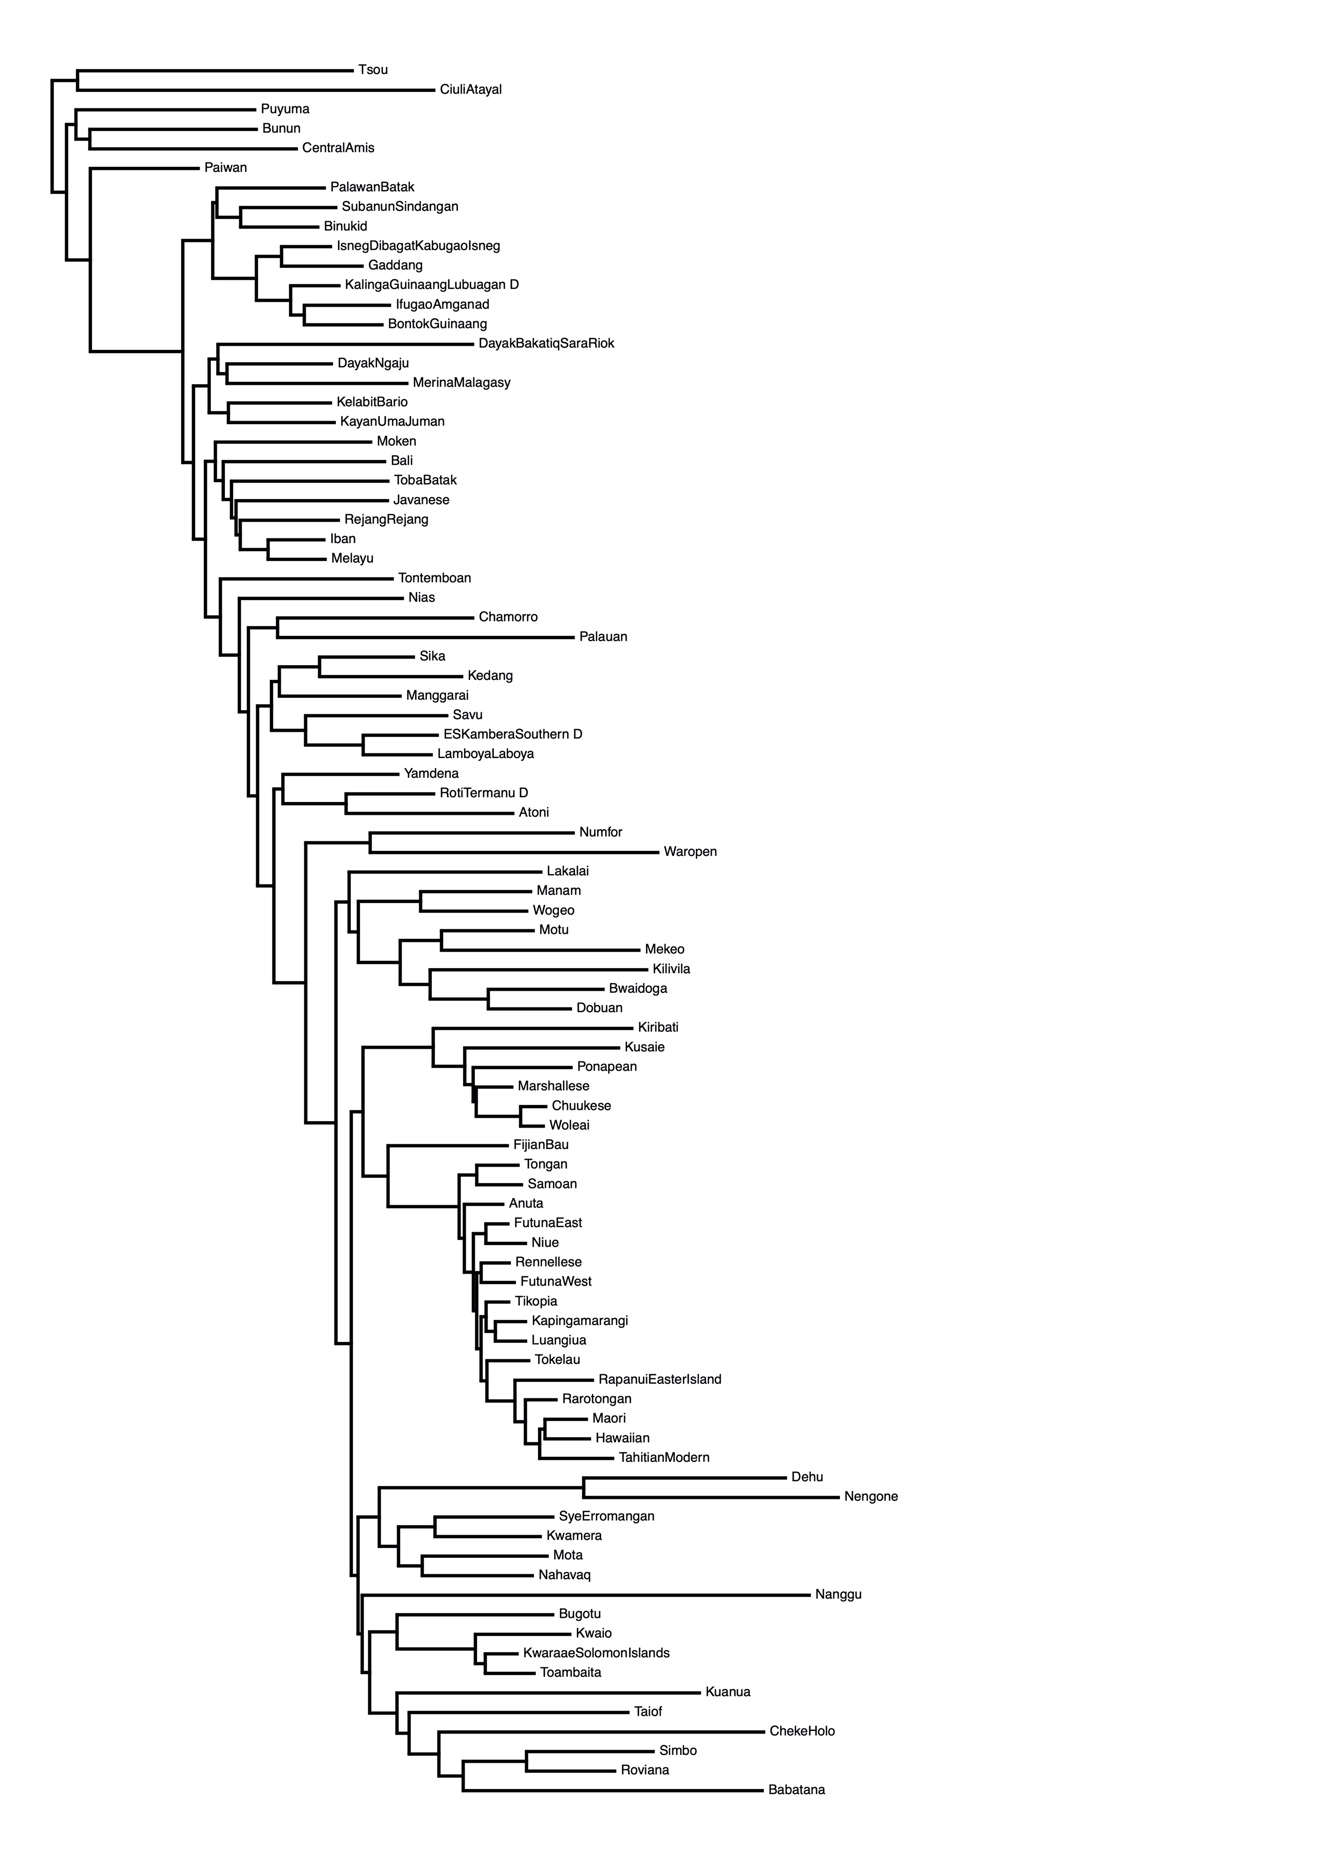
Fig. S1.

Phylogenetic tree used to extract the sister pairs used in our analyses. It is composed of all the languages included in Gray et al.39 for which the Pulotu69 database had an entry.
